# Supplementary material
Source: publisher figshare collection journal article supplement (https://gsapubs.figshare.com/ndownloader/files/24697109)
Supplement: Supplementary file 1 [file 24697109]

## Sheet: G47850
Jiang, Q., et al., 2020, Longest continuously erupting large igneous province driven by plume-ridge interaction: Geology, v. 49, https://doi.org/10.1130/G47850.1

## Sheet: KG6pl
	KG6pl	119-738C-35R-5, 107-122
	Relative Abundances			36Ar [V]	%1s	37Ar [V]	%1s	38Ar [V]	%1s	39Ar [V]	%1s	40Ar [V]	%1s	40(r)/39(k)	± 2s	Age	± 2s	40Ar(r)	39Ar(k)	K/Ca	± 2s
																(Ma)		(%)	(%)
	9M53803	2.5		9.1848e-06	9.54239	0.00511754	297.186	2.63852e-05	175.872	0.000209459	5.53861	0.00344197	7.84168	5.38174	12.2727	99.4688	220.706	32.1943	0.350152	0.020922	0.124396
	9M53804	3	4	1.2929e-05	6.21482	0.0146188	107.056	6.4153e-05	52.3614	0.00041444	2.33908	0.00508206	5.31113	5.9058	6.39519	108.869	114.411	46.9809	0.687505	0.0143805	0.0308077
	9M53806	3.5	4	2.16107e-05	3.82639	0.0219305	57.6695	1.84935e-05	209.848	0.00062568	1.84435	0.00836652	3.20755	5.97989	3.50127	110.194	62.5925	43.6305	1.03809	0.0144742	0.0167086
	9M53807	4	4	1.85789e-05	5.01118	0.0430443	31.0897	6.03257e-05	69.2059	0.000818126	1.15657	0.00801505	3.35545	7.46125	2.87221	136.484	50.6055	73.3749	1.34041	0.00952203	0.00592943
	9M53808	4.5	4	1.82086e-05	4.6039	0.0327389	45.4323	-3.32649e-05	100.956	0.000957806	0.916013	0.00829145	3.23533	5.82285	2.64241	107.384	47.312	65.6661	1.59012	0.0148517	0.0135018
	9M53810	5	4	2.04055e-05	4.65481	0.041654	34.4195	-2.96151e-05	155.356	0.00136225	0.60045	0.0110641	2.42044	6.19998	1.80379	114.124	32.1764	74.7143	2.26738	0.0166447	0.0114626
	9M53811	5.5	4	1.98482e-05	4.06283	0.0551515	27.1898	1.41064e-05	298.229	0.00130153	0.691667	0.0116688	2.29639	7.99992	1.97172	145.95	34.5585	86.6027	2.14816	0.0119102	0.00648192
	9M53812	6	4	2.21486e-05	4.63782	0.0552775	33.6821	1.65592e-06	2204.86	0.00160128	0.636723	0.0119198	2.24335	6.19339	1.96061	114.006	34.9761	81.2048	2.65776	0.014702	0.00990875
	9M53814	7	4	2.98404e-05	3.10513	0.0701445	26.3257	4.98618e-05	77.235	0.00233626	0.402293	0.0161451	1.66398	5.58993	1.32405	103.209	23.7618	79.2006	3.89007	0.0169579	0.00893172
	9M53815	8	4	4.10147e-05	2.76224	0.120587	12.4732	3.29605e-05	139.065	0.0033425	0.249672	0.0230433	1.16184	6.2406	0.780126	114.848	13.9105	88.2522	5.54164	0.0140523	0.00350746
	9M53816	10	4	6.45521e-05	1.55439	0.151169	10.6553	5.58942e-05	74.4068	0.00559144	0.209302	0.0381848	0.701116	5.62637	0.489627	103.863	8.7838	80.8394	9.32997	0.0188724	0.00402339
	9M53818	12	4	5.72416e-05	1.5968	0.156225	10.6236	3.29324e-05	136.063	0.00535326	0.214313	0.0354563	0.755818	5.85787	0.524322	108.011	9.38468	86.6495	8.91894	0.0174571	0.00371074
	9M53819	15	4	8.17916e-05	1.00968	0.170454	9.57033	6.91838e-05	52.532	0.00604704	0.147453	0.0463493	0.577928	5.97299	0.454959	110.07	8.13391	76.401	10.0819	0.0180862	0.00346295
	9M53820	18	4	6.54391e-05	1.74518	0.142312	11.1512	0.000116823	30.9349	0.00519461	0.216059	0.0403327	0.663036	6.29131	0.524107	115.752	9.34074	79.4854	8.66559	0.0186193	0.00415416
	9M53822	21	4	6.84867e-05	1.66934	0.160655	10.5256	6.9483e-05	56.1711	0.0051227	0.224079	0.0393259	0.68021	6.30322	0.564481	115.965	10.0591	80.3179	8.52163	0.0162195	0.00341606
	9M53823	24	4	7.04158e-05	1.57561	0.171552	8.24815	4.30404e-05	85.3683	0.00460598	0.202318	0.0374359	0.718455	6.68238	0.538008	122.709	9.55168	80.0895	7.63004	0.0136	0.00224502
	9M53825	27	4	4.59589e-05	2.11565	0.0888527	18.7765	2.4023e-05	152.437	0.00346605	0.381244	0.0277562	0.966402	6.18692	0.812765	113.891	14.5002	75.8825	5.78924	0.0199232	0.00748462
	9M53826	30	4	5.35318e-05	1.60081	0.0858439	18.8559	3.59114e-05	105.241	0.00236936	0.383243	0.0246809	1.08811	6.70593	1.15867	123.127	20.566	62.7557	3.92781	0.013991	0.00527919
	9M53828	35		4.08565e-05	2.83109	0.0860893	19.9098	7.46672e-05	56.2464	0.00239371	0.439985	0.0212626	1.26089	6.80444	1.22554	124.874	21.7318	74.6885	3.96892	0.0140972	0.00561674
	9M53829	40		8.45413e-05	1.39626	0.125496	11.8362	4.54338e-05	69.4246	0.00312928	0.353225	0.037001	0.727233	7.1291	0.830735	130.622	14.6843	58.6124	5.17324	0.012605	0.00298655
	9M53831	45		5.98494e-05	2.22983	0.0943043	16.2923	4.82451e-05	63.1661	0.00261464	0.372451	0.0347278	0.776358	9.54059	1.03265	172.754	17.8329	70.0302	4.33492	0.0140559	0.00458285
	9M53832	50		0.000128486	0.762935	0.0581638	28.7165	4.15018e-05	93.3097	0.00130264	0.753511	0.0507544	0.533629	13.4645	2.21263	239.278	36.8299	33.485	2.14648	0.0112845	0.00648674
			S	0.00103492	0.452559	1.95138	3.79691	0.000862201	21.2777	0.0601601	0.0799276	0.540306	0.233079
	Information on Analysis and Constants Used in Calculations									Results		40(a)/36(a)	± 2s	40(r)/39(k)	± 2s	Age	± 2s	MSWD	39Ar(k)	K/Ca	± 2s
																(Ma)			(%,n)
	Sample = KG6PLG				Age Equations = Min et al. (2000)					Age Plateau				6.13692	0.19317	112.999	3.44881	1.06499	84.0263	0.0156189	0.00123782
	Material = plg				Negative Intensities = Allowed										0.0314767		0.0305208	0.383019	17
	Location = Laser				Decay Constant 40K = 5.531 ± 0.013 E-10 1/a
	Analyst = Adam Frew				Decay Constant 39Ar = 2.940 ± 0.029 E-07 1/h					Analytical Error							3.44796	1.03199	Error Magnification
	Project = KERGUELEN_Q JIANG19				Decay Constant 37Ar = 8.264 ± 0.009 E-04 1/h
	Mass Discrimination Law = POW				Decay Constant 36Cl = 2.303 ± 0.046 E-06 1/a					Total Fusion Age				6.55925	0.21028	120.521	3.73867		22	0.0156699	0.00119054
	Irradiation = I26t40h				Decay Constant 40K(EC,β⁺) = 0.576 ± 0.002 E-10 1/a										0.0320585		0.0310209
	J = 0.01050820 ± 0.00000368				Decay Constant 40K(β⁻) = 4.955 ± 0.013 E-10 1/a
	GA1550 = 99.738 ± 0.100 Ma				Atmospheric Ratio 40/36(a) = 298.56 ± 0.30					Analytical Error							3.73778
	IGSN = Undefined				Atmospheric Ratio 38/36(a) = 0.1869 ± 0.0002
	Preferred Age = Undefined				Production Ratio 39/37(ca) = 0.000695 ± 0.000009					Normal Isochron		391.648	106.205	5.48839	0.630116	101.386	11.3199	0.510248	84.0263
	Classification = Undefined				Production Ratio 38/37(ca) = 0.000020 ± 0.000001								0.271175		0.114809		0.111651	0.936914	17
	Experiment Type = Undefined				Production Ratio 36/37(ca) = 0.000265 ± 0.000002
	Extraction Method = Undefined				Production Ratio 40/39(k) = 0.000730 ± 0.000091					Analytical Error							11.3196	1	Error Magnification
	Heating = 60 sec				Production Ratio 38/39(k) = 0.012150 ± 0.000030												70		Number of Iterations
	Isolation = 3.00 min				Production Ratio 36/38(cl) = 263.00 ± 13.15												5.15949e-05		Convergence
	Instrument = ARGUS VI				Scaling Ratio K/Ca = 0.520
	Lithology = Undefined				Abundance Ratio 40K/K = 1.1700 ± 0.0100 E-04					Inverse Isochron		429.551	135.75	5.44287	0.641579	100.568	11.531	0.642767	84.0263
	Lat-Lon = Undefined - Undefined				Atomic Weight K = 39.0983 ± 0.0001 g								0.316029		0.117875		0.114659	0.841664	17
	Feature = Undefined
										Analytical Error							11.5308	1	Error Magnification
																	3		Number of Iterations
																	6.88788e-06		Convergence
																	0.4081		Spreading Factor

## Sheet: KG8gm
	KG8gm	119-738C-36R-1, 62-78
	Relative Abundances			36Ar [V]	%1s	37Ar [V]	%1s	38Ar [V]	%1s	39Ar [V]	%1s	40Ar [V]	%1s	40(r)/39(k)	± 2s	Age	± 2s	40Ar(r)	39Ar(k)	K/Ca	± 2s
																(Ma)		(%)	(%)
	9M57713	3		0.000271179	1.08447	0.222721	24.8904	0.000563278	8.79698	0.0241137	0.0978733	0.222975	0.295268	6.66388	0.378493	123.786	6.79551	71.6039	4.5534	0.0559381	0.0278472
	9M57715	4		0.000397683	0.709286	0.365557	11.9479	0.00092261	6.25425	0.0471187	0.0785921	0.378816	0.173695	6.16726	0.155274	114.848	2.80163	76.2973	8.90667	0.0666643	0.0159305
	9M57717	5	4	0.000384417	0.797062	0.531743	9.9491	0.00111252	4.29891	0.0612982	0.074571	0.455865	0.145175	6.28898	0.143315	117.043	2.5827	84.0554	11.5795	0.0595831	0.0118565
	9M57718	6	4	0.000329661	1.0289	0.583538	8.02488	0.00108707	4.43978	0.0622811	0.077804	0.447967	0.147052	6.39544	0.127174	118.96	2.28939	88.3372	11.7595	0.0551383	0.00885018
	9M57720	7	4	0.000265909	1.05262	0.541787	7.52151	0.000808931	6.10131	0.0535119	0.0793605	0.380681	0.173666	6.47671	0.129142	120.423	2.32295	90.4017	10.0984	0.0509985	0.00767235
	9M57721	8	4	0.000219292	1.34191	0.432562	12.5601	0.000682923	9.25833	0.0436249	0.0792886	0.309226	0.212933	6.41605	0.205803	119.331	3.70413	89.8923	8.23381	0.0520818	0.0130836
	9M57723	9	4	0.00020221	1.37484	0.385924	9.64884	0.000586187	8.02792	0.0372737	0.0872922	0.263878	0.249987	6.3243	0.170397	117.679	3.06968	88.6901	7.03292	0.0498618	0.00962282
	9M57724	10	4	0.000184582	1.51882	0.327287	12.6814	0.000501223	9.65161	0.0333775	0.0834663	0.232442	0.283411	6.13024	0.209229	114.18	3.77653	87.4272	6.30019	0.0526694	0.0133591
	9M57726	12		0.000239737	1.25788	0.447742	12.9063	0.000636725	7.96587	0.0385623	0.0801834	0.261681	0.251557	5.896	0.247059	109.947	4.4698	86.1844	7.26965	0.0444242	0.0114676
	9M57727	14		0.000249802	1.29569	0.517558	7.30696	0.000556809	8.51888	0.035704	0.0915391	0.233885	0.2814	5.66555	0.183327	105.773	3.32443	85.6167	6.71721	0.0355111	0.00519025
	9M57729	16		0.000200038	1.55029	0.468997	8.40327	0.000419485	11.1749	0.0251942	0.0880682	0.164173	0.400766	5.69222	0.268567	106.256	4.86885	86.2234	4.72622	0.0275726	0.00463467
	9M57730	18		0.00020771	1.34635	0.427656	12.0566	0.000392878	14.5942	0.0198049	0.102016	0.134681	0.4888	5.46006	0.433816	102.042	7.88301	79.0853	3.70745	0.02372	0.00572052
	9M57732	20		0.000162633	1.64393	0.371144	12.3523	0.000194091	27.887	0.0125458	0.144493	0.09036	0.728537	5.79146	0.616216	108.054	11.1603	78.7566	2.33531	0.0172162	0.00425444
	9M57733	21		9.75584e-05	2.74089	0.209868	26.348	0.000123234	50.9349	0.00706761	0.206442	0.0553488	1.1888	6.1872	1.30169	115.207	23.4818	77.3752	1.31548	0.0171504	0.00903984
	9M57735	22		7.35452e-05	3.53595	0.128258	30.7673	0.000108617	44.216	0.00506503	0.303834	0.0393441	1.67316	5.5342	1.32223	103.389	24.0087	69.9916	0.945673	0.0201739	0.0124166
	9M57736	24		9.55136e-05	2.74119	0.157162	24.6239	4.65673e-05	94.3253	0.00439167	0.345327	0.040781	1.6132	5.76672	1.51055	107.606	27.3644	60.5569	0.813883	0.0141693	0.00698107
	9M57738	26		7.75266e-05	3.51881	0.149729	33.9941	2.22572e-05	235.236	0.00354372	0.429465	0.0321909	2.04374	6.07281	2.42391	113.143	43.7761	64.8892	0.65371	0.0119457	0.00812607
	9M57739	28		6.55906e-05	4.03948	0.11655	40.9381	4.75176e-05	122.321	0.00272069	0.546979	0.0276123	2.38243	6.53492	2.97057	121.469	53.4023	62.4727	0.501676	0.0117773	0.00964824
	9M57741	30		4.37679e-05	6.05979	0.10205	45.2566	8.1237e-05	56.1657	0.0023459	0.639017	0.0207346	3.17247	6.92259	3.34493	128.425	59.9013	75.9539	0.432361	0.0115922	0.0104987
	9M57742	40		0.000176928	1.60279	0.25209	18.1089	0.000182625	26.554	0.00616315	0.224339	0.0660162	0.996748	5.53598	1.26133	103.421	22.9025	50.2137	1.13801	0.0123517	0.00447578
	9M57744	50		0.000185232	1.46437	0.255758	20.1432	6.73182e-05	76.6221	0.00532846	0.278278	0.0680779	0.966798	6.40813	1.63799	119.189	29.4835	48.4834	0.978897	0.0104723	0.00422186
			S	0.00413051	0.316957	6.99568	3.08669	0.00914411	2.58832	0.531037	0.0239847	3.92674	0.0768554
	Information on Analysis and Constants Used in Calculations									Results		40(a)/36(a)	± 2s	40(r)/39(k)	± 2s	Age	± 2s	MSWD	39Ar(k)	K/Ca	± 2s
																(Ma)			(%,n)
	Sample = KG8GM				Age Equations = Min et al. (2000)					Age Plateau				6.36229	0.0885282	118.363	1.60901	1.97007	55.0044	0.0529834	0.00411299
	Material = gm				Negative Intensities = Allowed										0.0139145		0.0135938	0.0795881	6
	Location = Laser				Decay Constant 40K = 5.531 ± 0.013 E-10 1/a
	Analyst = Adam Frew				Decay Constant 39Ar = 2.940 ± 0.029 E-07 1/h					Analytical Error							1.59422	1.40359	Error Magnification
	Project = KERGUELEN_Q JIANG19				Decay Constant 37Ar = 8.264 ± 0.009 E-04 1/h
	Mass Discrimination Law = POW				Decay Constant 36Cl = 2.303 ± 0.046 E-06 1/a					Total Fusion Age				6.17106	0.0678908	114.916	1.24305		21	0.0391114	0.00241467
	Irradiation = I27t40h				Decay Constant 40K(EC,β⁺) = 0.576 ± 0.002 E-10 1/a										0.0110015		0.010817
	J = 0.01063310 ± 0.00001010				Decay Constant 40K(β⁻) = 4.955 ± 0.013 E-10 1/a
	GA1550 = 99.738 ± 0.100 Ma				Atmospheric Ratio 40/36(a) = 298.56 ± 0.30					Analytical Error							1.22491
	IGSN = Undefined				Atmospheric Ratio 38/36(a) = 0.1869 ± 0.0002
	Preferred Age = Undefined				Production Ratio 39/37(ca) = 0.000695 ± 0.000009					Normal Isochron No Convergence		296.419	184.76	6.32977	0.557232	117.777	10.0402	2.83096	55.0044
	Classification = Undefined				Production Ratio 38/37(ca) = 0.000020 ± 0.000001								0.623307		0.0880336		0.0852475	0.0231556	6
	Experiment Type = Undefined				Production Ratio 36/37(ca) = 0.000265 ± 0.000002
	Extraction Method = Undefined				Production Ratio 40/39(k) = 0.000730 ± 0.000091					Analytical Error							10.0379	1.68255	Error Magnification
	Heating = 60 sec				Production Ratio 38/39(k) = 0.012150 ± 0.000030												100		Number of Iterations
	Isolation = 3.00 min				Production Ratio 36/38(cl) = 263.00 ± 13.15												0.00227886		Convergence
	Instrument = ARGUS VI				Scaling Ratio K/Ca = 0.520
	Lithology = Undefined				Abundance Ratio 40K/K = 1.1700 ± 0.0100 E-04					Inverse Isochron Error Chron		282.68	188.139	6.40823	0.449722	119.19	8.09788	2.44525	55.0044
	Lat-Lon = Undefined - Undefined				Atomic Weight K = 39.0983 ± 0.0001 g								0.665554		0.0701789		0.0679408	0.0442825	6
	Feature = Undefined
										Analytical Error							8.09491	1.56373	Error Magnification
																	5		Number of Iterations
																	1.23535e-05		Convergence
																	0.0574387		Spreading Factor

## Sheet: KG9gm
	KG9gm	119-738C-36R-3, 58-70
	Relative Abundances			36Ar [V]	%1s	37Ar [V]	%1s	38Ar [V]	%1s	39Ar [V]	%1s	40Ar [V]	%1s	40(r)/39(k)	± 2s	Age	± 2s	40Ar(r)	39Ar(k)	K/Ca	± 2s
																(Ma)		(%)	(%)
	9M57879	3	4	0.0003311	0.710934	0.209678	17.6315	0.000512261	8.2707	0.0281349	0.0886035	0.27308	0.147579	6.81756	0.217884	127.917	3.94689	69.8762	7.4108	0.069413	0.0244777
	9M57881	4	4	0.000421137	0.585466	0.471177	8.08788	0.000888185	3.4588	0.0518389	0.0792544	0.441306	0.0917088	6.84994	0.122873	128.504	2.22507	79.9559	13.6389	0.056849	0.0091964
	9M57883	5	4	0.000345978	0.69338	0.455335	11.7561	0.000850257	4.49996	0.0517518	0.0746586	0.413541	0.0982735	6.73209	0.168785	126.368	3.06009	83.7321	13.6187	0.05874	0.0138116
	9M57884	6	4	0.000254433	0.922029	0.402894	14.3572	0.000640261	5.61481	0.0430091	0.0795537	0.333326	0.121066	6.76879	0.218543	127.034	3.96076	86.769	11.3135	0.0551487	0.0158362
	9M57886	7	4	0.000185342	1.1827	0.269667	15.939	0.000567115	5.85027	0.0342849	0.083307	0.259671	0.155482	6.61838	0.205414	124.306	3.72844	86.9061	9.02813	0.0657504	0.0209605
	9M57887	8	4	0.000137512	1.49354	0.271238	15.0367	0.000377811	10.6572	0.0261304	0.0931261	0.195595	0.20606	6.78397	0.256261	127.309	4.64363	89.9761	6.86872	0.0497341	0.0149575
	9M57889	9	4	0.000119413	1.65826	0.183212	20.1487	0.000314393	11.016	0.0223768	0.0959837	0.165538	0.24444	6.48869	0.271252	121.95	4.92986	87.2128	5.89108	0.0631494	0.0254482
	9M57890	10	4	0.000101338	2.07723	0.188707	25.0675	0.000291321	10.6862	0.019081	0.0903155	0.139626	0.288637	6.5592	0.403828	123.231	7.33417	89.0206	5.01742	0.0522181	0.0261804
	9M57892	12		0.000137051	1.51599	0.255881	16.9917	0.000430168	8.99696	0.0225362	0.0909964	0.160708	0.251362	6.26363	0.315794	117.855	5.75242	87.1426	5.91992	0.0454366	0.0154416
	9M57893	14		0.000140078	1.43768	0.216598	21.0323	0.00038163	10.9172	0.0191612	0.0886146	0.135962	0.296309	5.85399	0.387694	110.378	7.09138	81.8525	5.03353	0.0456401	0.0191991
	9M57895	16		0.000157903	1.31445	0.347474	11.591	0.000229405	16.63	0.0161576	0.0975695	0.115169	0.350191	6.00076	0.412805	113.06	7.5395	82.9291	4.21416	0.0238187	0.00552248
	9M57896	18		0.000134227	1.47791	0.244293	19.5094	0.000223457	18.0668	0.0111393	0.120111	0.0832825	0.483639	5.70137	0.701418	107.584	12.8496	75.0956	2.90445	0.0233497	0.00911202
	9M57898	20		0.000117451	1.68794	0.211334	20.904	0.000121183	35.9806	0.00772806	0.144475	0.0607072	0.663479	5.58733	0.943204	105.494	17.299	69.7752	2.0073	0.018654	0.00780051
	9M57899	21		8.07288e-05	2.44064	0.164594	28.2727	9.18152e-05	44.7932	0.00509886	0.230539	0.0431428	0.933232	6.43263	1.50801	120.931	27.4229	74.3188	1.31975	0.0157474	0.00890708
	9M57901	22		7.71599e-05	2.54389	0.146813	32.4003	5.78379e-05	68.6622	0.00417494	0.305403	0.03543	1.13643	5.89402	1.88417	111.11	34.4498	67.7556	1.0784	0.0144259	0.00935142
	9M57902	24		7.65902e-05	2.78308	0.225794	16.6896	5.8663e-05	61.4195	0.00341193	0.369093	0.0331042	1.21779	8.63339	1.89809	160.515	33.7688	84.8888	0.86184	0.00749622	0.00250577
	9M57904	26		6.5232e-05	3.09001	0.205343	22.7471	6.10374e-05	70.1789	0.00327225	0.364181	0.0288021	1.40003	8.17175	2.41506	152.283	43.1623	88.7914	0.82862	0.00792508	0.00360972
	9M57905	28		5.99542e-05	3.50093	0.115848	38.6333	-3.93445e-06	1000.13	0.0026206	0.53629	0.0267125	1.50716	7.07706	2.85611	132.612	51.6032	67.2957	0.672548	0.0114016	0.00881495
	9M57907	30		5.68734e-05	3.56107	0.0535906	86.6667	4.85655e-05	89.7021	0.00218725	0.527389	0.0214177	1.87929	4.03656	3.48701	76.8255	64.9761	40.5206	0.569264	0.0208619	0.0361667
	9M57908	40		0.000121312	1.68202	0.174262	25.0507	4.69347e-05	76.3642	0.00388017	0.279361	0.0431914	0.934972	5.52189	1.88173	104.293	34.535	48.0585	0.995301	0.0112171	0.00562321
	9M57910	50		0.000127539	1.56937	0.145737	34.5231	8.34873e-05	38.1199	0.00315165	0.413302	0.0425146	0.949223	5.23536	2.65636	99.0268	48.8939	37.563	0.807657	0.0108839	0.00751967
			S	0.00324835	0.298182	4.95947	4.16071	0.00627185	2.79598	0.381128	0.0257336	3.05183	0.0605779
	Information on Analysis and Constants Used in Calculations									Results		40(a)/36(a)	± 2s	40(r)/39(k)	± 2s	Age	± 2s	MSWD	39Ar(k)	K/Ca	± 2s
																(Ma)			(%,n)
	Sample = KG9GM				Age Equations = Min et al. (2000)					Age Plateau				6.7524	0.0816169	126.737	1.48931	1.34551	72.7873	0.0573274	0.00554942
	Material = gm				Negative Intensities = Allowed										0.0120871		0.0117513	0.223982	8
	Location = Laser				Decay Constant 40K = 5.531 ± 0.013 E-10 1/a
	Analyst = Adam Frew				Decay Constant 39Ar = 2.940 ± 0.029 E-07 1/h					Analytical Error							1.47942	1.15996	Error Magnification
	Project = KERGUELEN_Q JIANG19				Decay Constant 37Ar = 8.264 ± 0.009 E-04 1/h
	Mass Discrimination Law = POW				Decay Constant 36Cl = 2.303 ± 0.046 E-06 1/a					Total Fusion Age				6.55143	0.0886523	123.09	1.61879		21	0.0395998	0.00329547
	Irradiation = I27t40h				Decay Constant 40K(EC,β⁺) = 0.576 ± 0.002 E-10 1/a										0.0135317		0.0131513
	J = 0.01075270 ± 0.00000753				Decay Constant 40K(β⁻) = 4.955 ± 0.013 E-10 1/a
	GA1550 = 99.738 ± 0.100 Ma				Atmospheric Ratio 40/36(a) = 298.56 ± 0.30					Analytical Error							1.6102
	IGSN = Undefined				Atmospheric Ratio 38/36(a) = 0.1869 ± 0.0002
	Preferred Age = Undefined				Production Ratio 39/37(ca) = 0.000695 ± 0.000009					Normal Isochron		339.63	38.6795	6.53069	0.206673	122.713	3.75826	0.956681	72.7873
	Classification = Undefined				Production Ratio 38/37(ca) = 0.000020 ± 0.000001								0.113887		0.0316464		0.0306264	0.452926	8
	Experiment Type = Undefined				Production Ratio 36/37(ca) = 0.000265 ± 0.000002
	Extraction Method = Undefined				Production Ratio 40/39(k) = 0.000730 ± 0.000091					Analytical Error							3.75459	1	Error Magnification
	Heating = 60 sec				Production Ratio 38/39(k) = 0.012150 ± 0.000030												85		Number of Iterations
	Isolation = 3.00 min				Production Ratio 36/38(cl) = 263.00 ± 13.15												6.37029e-05		Convergence
	Instrument = ARGUS VI				Scaling Ratio K/Ca = 0.520
	Lithology = Undefined				Abundance Ratio 40K/K = 1.1700 ± 0.0100 E-04					Inverse Isochron		334.213	39.1282	6.57745	0.205056	123.563	3.72723	0.879511	72.7873
	Lat-Lon = Undefined - Undefined				Atomic Weight K = 39.0983 ± 0.0001 g								0.117076		0.0311757		0.0301647	0.5088	8
	Feature = Undefined
										Analytical Error							3.72347	1	Error Magnification
																	3		Number of Iterations
																	1.75689e-06		Convergence
																	0.218571		Spreading Factor

## Sheet: KG10pl
	KG10pl	119-738C-36R-3, 9-24
	Relative Abundances			36Ar [V]	%1s	37Ar [V]	%1s	38Ar [V]	%1s	39Ar [V]	%1s	40Ar [V]	%1s	40(r)/39(k)	± 2s	Age	± 2s	40Ar(r)	39Ar(k)	K/Ca	± 2s
																(Ma)		(%)	(%)
	9M47804	2.5		4.37237e-05	2.57739	0.0996163	1.36473	4.95586e-05	72.2763	0.00370571	0.257969	0.026857	1.68406	5.96227	0.319304	109.097	5.66984	80.7302	1.4332	0.0189825	0.000527821
	9M47805	3		8.20126e-05	1.134	0.206956	0.699172	7.18266e-05	52.0832	0.00768618	0.12196	0.128942	0.348895	16.0195	0.153542	279.403	2.48135	93.7047	2.97257	0.018951	0.000269366
	9M47807	3.5	4	0.000125364	3.09985	0.354945	0.421749	3.9609e-05	115.956	0.013227	0.103559	0.0872578	0.309193	6.00157	0.188448	109.795	3.34495	89.2783	5.11577	0.0190164	0.000165642
	9M47808	4	4	0.000141655	2.80527	0.403706	0.417137	0.000182214	28.1245	0.0151187	0.0880576	0.0984006	0.274558	5.93322	0.169274	108.581	3.00664	89.4689	5.84796	0.0191125	0.000163396
	9M47809	4.5	4	0.000152294	2.56015	0.425003	0.405427	0.00017502	26.5027	0.0161061	0.0834936	0.109031	0.24827	6.14625	0.156686	112.361	2.77724	89.1272	6.23127	0.0193447	0.000160574
	9M47811	5	4	0.000151648	2.646	0.400683	0.40994	0.000161538	34.6468	0.0153748	0.0960338	0.103725	0.260984	5.97097	0.167828	109.252	2.97985	86.9023	5.94971	0.0195917	0.000165431
	9M47812	5.5	4	0.000155764	2.5159	0.434851	0.409852	0.000212552	22.6314	0.0170036	0.076366	0.109656	0.245666	5.8405	0.149155	106.934	2.6517	88.9543	6.58228	0.0199717	0.000166919
	9M47813	6	4	0.000142741	2.67799	0.379744	0.419745	0.000232698	22.0321	0.0148484	0.0767632	0.0994489	0.27068	5.95631	0.165687	108.991	2.94226	87.3509	5.74798	0.0199711	0.000170823
	9M47815	7	4	0.000180009	2.31173	0.490437	0.402609	0.000217231	27.2046	0.0199849	0.0838954	0.130918	0.207082	5.9032	0.135011	108.048	2.39876	88.5766	7.74205	0.0208282	0.000171721
	9M47816	8	4	0.000175006	2.24144	0.448339	0.416826	0.000179038	30.4514	0.0174904	0.0822705	0.122028	0.221204	6.12601	0.14559	112.002	2.58107	86.2405	6.77046	0.0199246	0.00016971
	9M47817	10		0.000180555	2.12394	0.485512	0.40259	0.000282609	17.2445	0.0195918	0.0676205	0.135825	0.199789	6.24893	0.128084	114.18	2.26798	88.5843	7.58849	0.0206222	0.00016874
	9M47819	12		0.000150445	2.60451	0.415457	0.430926	0.000289846	19.1846	0.0164428	0.087286	0.111886	0.242299	6.18016	0.153991	112.962	2.72855	89.2287	6.36658	0.0202189	0.000178198
	9M47820	15		0.000143003	2.67947	0.383387	0.4056	0.000237833	22.9858	0.015694	0.0863743	0.104019	0.259215	5.94055	0.157104	108.712	2.79026	88.1077	6.08028	0.0209249	0.000173959
	9M47821	18		0.000134952	2.75694	0.327285	0.434165	0.000184725	35.5822	0.0122011	0.235347	0.108973	0.0491184	7.89809	0.194004	143.149	3.38063	86.7821	4.71901	0.019024	0.000188977
	9M47823	21		8.20752e-05	4.89504	0.197764	0.51749	0.000154486	43.2153	0.00722794	0.390135	0.0907248	0.0578492	11.546	0.353654	205.624	5.95334	90.2367	2.79448	0.0186437	0.000243569
	9M47824	24		9.88174e-05	3.81027	0.214452	0.498419	0.000120433	56.7671	0.00785045	0.364706	0.0742408	0.0804971	8.01161	0.301491	145.126	5.24792	83.1088	3.03525	0.0186742	0.000232449
	9M47826	27		0.00011651	3.22719	0.283014	0.436114	0.000115105	55.3136	0.0102637	0.280807	0.101211	0.0529921	8.82194	0.232821	159.176	4.02124	87.7475	3.96757	0.0184967	0.000193245
	9M47827	30		9.30061e-05	4.0378	0.168885	0.537245	0.000107856	62.5413	0.00581776	0.493383	0.0659469	0.0741432	9.04133	0.40691	162.961	7.01338	78.1523	2.24662	0.0175515	0.000258675
	9M47829	35		0.000107546	3.54266	0.243233	0.466539	0.000115792	57.6558	0.00878404	0.332519	0.0694013	0.0747187	6.56184	0.271525	119.713	4.79321	81.4541	3.39532	0.0184177	0.000212673
	9M47830	40		0.000109679	3.56767	0.121316	0.693779	6.92246e-05	101.847	0.00454857	0.640026	0.0509456	0.0989935	6.22608	0.532306	113.776	9.42767	54.558	1.75944	0.0191352	0.000364547
	9M47832	45		0.00010785	3.56534	0.15757	0.751032	-6.51489e-05	101.901	0.00589815	0.4912	0.0554251	0.0916597	6.16514	0.4048	112.696	7.17368	64.3892	2.2814	0.0191031	0.00034499
	9M47833	50		0.00020161	1.9309	0.0932122	1.03416	-9.18478e-05	69.3982	0.0035468	0.817271	0.071348	0.0722622	5.32092	0.677131	97.6729	12.0999	25.9678	1.37232	0.019425	0.00051591
			S	0.00287627	0.606104	6.73537	0.102991	0.0030422	8.85188	0.258413	0.0382486	2.05621	0.054056
	Information on Analysis and Constants Used in Calculations									Results		40(a)/36(a)	± 2s	40(r)/39(k)	± 2s	Age	± 2s	MSWD	39Ar(k)	K/Ca	± 2s
																(Ma)			(%,n)
	Sample = KG10PLG				Age Equations = Min et al. (2000)					Age Plateau				5.983	0.0780443	109.465	1.38961	1.96559	49.9875	0.0197015	0.000411541
	Material = plg				Negative Intensities = Allowed										0.0130443		0.0126945	0.0556349	8
	Location = Laser				Decay Constant 40K = 5.531 ± 0.013 E-10 1/a
	Analyst = Adam Frew				Decay Constant 39Ar = 2.940 ± 0.029 E-07 1/h					Analytical Error							1.38554	1.402	Error Magnification
	Project = KERGUELEN_Q JIANG19				Decay Constant 37Ar = 8.264 ± 0.009 E-04 1/h
	Mass Discrimination Law = POW				Decay Constant 36Cl = 2.303 ± 0.046 E-06 1/a					Total Fusion Age				6.81903	0.043294	124.247	0.77175		22	0.0195892	4.32009e-05
	Irradiation = I26t40h				Decay Constant 40K(EC,β⁺) = 0.576 ± 0.002 E-10 1/a										0.006349		0.00621142
	J = 0.01043120 ± 0.00000522				Decay Constant 40K(β⁻) = 4.955 ± 0.013 E-10 1/a
	FCs = 28.294 ± 0.037 Ma				Atmospheric Ratio 40/36(a) = 298.56 ± 0.30					Analytical Error							0.762352
	IGSN = Undefined				Atmospheric Ratio 38/36(a) = 0.1869 ± 0.0002
	Preferred Age = Undefined				Production Ratio 39/37(ca) = 0.000695 ± 0.000009					Normal Isochron No Convergence		607.482	346.722	5.13573	0.944265	94.3607	16.9046	0.490853	49.9875
	Classification = Undefined				Production Ratio 38/37(ca) = 0.000020 ± 0.000001								0.570753		0.183862		0.179149	0.815703	8
	Experiment Type = Undefined				Production Ratio 36/37(ca) = 0.000265 ± 0.000002
	Extraction Method = Undefined				Production Ratio 40/39(k) = 0.000730 ± 0.000091					Analytical Error							16.9044	1	Error Magnification
	Heating = 60 sec				Production Ratio 38/39(k) = 0.012150 ± 0.000030												100		Number of Iterations
	Isolation = 3.00 min				Production Ratio 36/38(cl) = 263.00 ± 13.15												0.000121192		Convergence
	Instrument = ARGUS VI				Scaling Ratio K/Ca = 0.520
	Lithology = Undefined				Abundance Ratio 40K/K = 1.1700 ± 0.0100 E-04					Inverse Isochron		626.617	418.545	5.10185	0.877984	93.7539	15.7234	0.570338	49.9875
	Lat-Lon = Undefined - Undefined				Atomic Weight K = 39.0983 ± 0.0001 g								0.667944		0.172091		0.167709	0.754313	8
	Feature = Undefined
										Analytical Error							15.7231	1	Error Magnification
																	3		Number of Iterations
																	0.000641731		Convergence
																	0.05883		Spreading Factor

## Sheet: KG10gm
	KG10gm	119-738C-36R-3, 9-24
	Relative Abundances			36Ar [V]	%1s	37Ar [V]	%1s	38Ar [V]	%1s	39Ar [V]	%1s	40Ar [V]	%1s	40(r)/39(k)	± 2s	Age	± 2s	40Ar(r)	39Ar(k)	K/Ca	± 2s
																(Ma)		(%)	(%)
	9M58143	3	4	0.000289535	1.09691	0.218437	29.0876	0.000867547	3.32071	0.0461704	0.172562	0.382942	0.0992916	6.81892	0.224682	127.942	4.06998	81.9438	5.38003	0.109549	0.0637321
	9M58145	4	4	0.0002648	0.924357	0.347276	19.6772	0.00108002	3.46838	0.0632922	0.171505	0.466299	0.0814482	6.5776	0.175389	123.565	3.18476	88.9393	7.37126	0.0944104	0.0371563
	9M58147	5	4	0.000240924	1.1376	0.458325	12.8765	0.00113988	2.77112	0.0731241	0.172185	0.521772	0.073514	6.6766	0.133155	125.362	2.41546	93.1621	8.51168	0.0826027	0.0212748
	9M58148	6	4	0.000207852	1.04307	0.407212	14.5135	0.00115784	3.37308	0.0760052	0.172595	0.535925	0.071138	6.68328	0.127623	125.483	2.31495	94.4296	8.85267	0.0966954	0.0280699
	9M58150	7	4	0.000163149	1.25584	0.413925	12.7004	0.000987894	4.86285	0.0669897	0.171269	0.469317	0.0817349	6.79647	0.1292	127.535	2.34091	96.5953	7.79812	0.0837956	0.0212869
	9M58151	8	4	0.000149809	1.21672	0.325048	18.4439	0.000892048	4.41248	0.06121	0.174482	0.428663	0.089464	6.71707	0.15926	126.096	2.88784	95.5609	7.12964	0.0975602	0.0359898
	9M58153	9	4	0.000124905	1.64864	0.191039	27.619	0.000722253	4.18911	0.0505179	0.171672	0.351539	0.108246	6.53651	0.170015	122.819	3.08845	93.686	5.89052	0.137146	0.0757585
	9M58154	10	4	0.000125547	1.52807	0.207712	36.6477	0.000683212	6.31688	0.0460216	0.174108	0.319103	0.119031	6.49648	0.265723	122.092	4.82901	93.3996	5.3635	0.114852	0.084183
	9M58156	12	4	0.000189852	1.2813	0.281296	21.7434	0.000980556	3.64137	0.0625421	0.171374	0.427048	0.0889145	6.29727	0.159275	118.468	2.90033	91.9367	7.28893	0.115253	0.0501215
	9M58157	14	4	0.000218962	1.11811	0.267546	19.9918	0.000927359	3.6862	0.0618486	0.170539	0.424165	0.0899823	6.16162	0.141739	115.996	2.58453	89.5742	7.20897	0.119847	0.047921
	9M58159	16	4	0.000241403	1.45123	0.335724	18.3632	0.000903291	5.3891	0.0570691	0.174116	0.392787	0.180165	6.11003	0.179	115.055	3.26566	88.4114	6.64466	0.0880324	0.0323329
	9M58160	18	4	0.000218807	1.56732	0.331246	16.9038	0.000878772	4.99238	0.0478637	0.173627	0.335762	0.210706	6.22796	0.19492	117.205	3.55189	88.3541	5.56882	0.0747764	0.0252817
	9M58162	20	4	0.000192752	1.67744	0.316792	23.4194	0.000591945	7.07629	0.0359567	0.175886	0.257249	0.27495	6.28949	0.336705	118.326	6.13173	87.3723	4.17795	0.05866	0.0274769
	9M58163	21	4	0.000137559	2.24902	0.221707	30.5432	0.000342449	12.599	0.0229991	0.175796	0.168484	0.419926	6.34483	0.481387	119.334	8.76164	86.0305	2.67081	0.0535816	0.0327323
	9M58165	22	4	0.000100204	2.98726	0.159938	38.6959	0.000224952	16.1096	0.0167151	0.178026	0.121075	0.583728	6.25162	0.606989	117.636	11.0581	85.7334	1.94116	0.0539836	0.0417803
	9M58166	24	4	0.00010319	2.89865	0.134107	46.6009	0.000176024	22.2839	0.0140637	0.189339	0.105869	0.667868	6.13156	0.72788	115.448	13.2765	80.9121	1.63329	0.0541709	0.0504898
	9M58168	26	4	0.00010316	3.06659	0.16019	39.8847	0.000210216	17.7335	0.0132615	0.199223	0.0981971	0.71977	6.08881	0.791086	114.668	14.4356	81.539	1.53739	0.0426874	0.0340531
	9M58169	28	4	7.36323e-05	4.01898	0.133586	46.7784	0.00013832	33.581	0.00754148	0.218291	0.0617762	1.14402	6.76144	1.36465	126.9	24.7339	81.5258	0.870819	0.0289948	0.027129
	9M58171	30	4	5.72026e-05	5.1498	0.102583	72.9669	0.000135484	32.8756	0.00637587	0.245788	0.0503989	1.40225	6.57331	1.91595	123.488	34.7919	82.2279	0.737067	0.0319583	0.0466412
	9M58172	40	4	0.000181722	1.72945	0.298067	19.946	0.00031237	14.6037	0.0139754	0.19436	0.113829	0.621292	6.04066	0.706214	113.789	12.8931	73.0655	1.60965	0.0240198	0.00958356
	9M58174	50	4	0.000231075	1.52596	0.388007	18.3166	0.000258535	16.9523	0.0157778	0.189193	0.135438	0.521999	6.26397	0.745596	117.861	13.5815	71.7248	1.81305	0.0207837	0.00761533
			S	0.00361604	0.357763	5.69976	5.08967	0.013611	1.35731	0.859321	0.0434126	6.16764	0.0427576
	Information on Analysis and Constants Used in Calculations									Results		40(a)/36(a)	± 2s	40(r)/39(k)	± 2s	Age	± 2s	MSWD	39Ar(k)	K/Ca	± 2s
																(Ma)			(%,n)
	Sample = KG10GM				Age Equations = Min et al. (2000)					Age Plateau Error Mean				6.51571	0.108628	122.441	1.98068	5.76884	100	0.0418957	0.0132787
	Material = gm				Negative Intensities = Allowed										0.0166718		0.0161766	2.0341e-15	21
	Location = Laser				Decay Constant 40K = 5.531 ± 0.013 E-10 1/a
	Analyst = Adam Frew				Decay Constant 39Ar = 2.940 ± 0.029 E-07 1/h					Analytical Error							1.97373	2.40184	Error Magnification
	Project = KERGUELEN_Q JIANG19				Decay Constant 37Ar = 8.264 ± 0.009 E-04 1/h
	Mass Discrimination Law = POW				Decay Constant 36Cl = 2.303 ± 0.046 E-06 1/a					Total Fusion Age				6.4755	0.0551846	121.711	1.01653		21	0.0780361	0.00794393
	Irradiation = I27t40h				Decay Constant 40K(EC,β⁺) = 0.576 ± 0.002 E-10 1/a										0.00852205		0.00835203
	J = 0.01075270 ± 0.00000753				Decay Constant 40K(β⁻) = 4.955 ± 0.013 E-10 1/a
	GA1550 = 99.738 ± 0.100 Ma				Atmospheric Ratio 40/36(a) = 298.56 ± 0.30					Analytical Error							1.00308
	IGSN = Undefined				Atmospheric Ratio 38/36(a) = 0.1869 ± 0.0002
	Preferred Age = Undefined				Production Ratio 39/37(ca) = 0.000695 ± 0.000009					Normal Isochron No Convergence		98.5928	114.723	6.74307	0.265532	126.568	4.81665	14.0106	100
	Classification = Undefined				Production Ratio 38/37(ca) = 0.000020 ± 0.000001								1.1636		0.0393785		0.0380559	1.59443e-45	21
	Experiment Type = Undefined				Production Ratio 36/37(ca) = 0.000265 ± 0.000002
	Extraction Method = Undefined				Production Ratio 40/39(k) = 0.000730 ± 0.000091					Analytical Error							4.81361	3.74307	Error Magnification
	Heating = 60 sec				Production Ratio 38/39(k) = 0.012150 ± 0.000030												100		Number of Iterations
	Isolation = 3.00 min				Production Ratio 36/38(cl) = 263.00 ± 13.15												0.00112846		Convergence
	Instrument = ARGUS VI				Scaling Ratio K/Ca = 0.520
	Lithology = Undefined				Abundance Ratio 40K/K = 1.1700 ± 0.0100 E-04					Inverse Isochron Error Chron		392.823	170.866	6.32926	0.268577	119.05	4.89175	5.47955	100
	Lat-Lon = Undefined - Undefined				Atomic Weight K = 39.0983 ± 0.0001 g								0.434969		0.0424342		0.0410898	9.58187e-14	21
	Feature = Undefined
										Analytical Error							4.88909	2.34084	Error Magnification
																	4		Number of Iterations
																	0.000543605		Convergence
																	0.199394		Spreading Factor

## Sheet: KG14pl
	KG14pl	120-747C-13R-1, 32-47
	Relative Abundances			36Ar [V]	%1s	37Ar [V]	%1s	38Ar [V]	%1s	39Ar [V]	%1s	40Ar [V]	%1s	40(r)/39(k)	± 2s	Age	± 2s	40Ar(r)	39Ar(k)	K/Ca	± 2s
																(Ma)		(%)	(%)
	9M47925	2.5	4	6.03088e-05	3.97662	0.139097	0.680781	-2.67165e-05	139.928	0.00225755	0.488135	0.0170184	3.47762	4.63526	0.868156	84.7432	15.5057	58.8551	1.6597	0.00807818	0.000137836
	9M47926	3	4	0.000102113	2.60627	0.275061	0.501928	7.71418e-05	56.3985	0.00440885	0.307587	0.0295031	2.00495	4.92612	0.481563	89.9305	8.5763	70.4224	3.23946	0.00797348	9.55889e-05
	9M47928	3.5	4	0.000142531	1.71882	0.402931	0.42326	7.49691e-05	47.8209	0.00663604	0.178799	0.0409321	1.44524	4.75969	0.311261	86.9642	5.55244	73.9093	4.88184	0.0082027	7.65317e-05
	9M47929	4	4	0.000155609	1.62758	0.453915	0.411185	0.000104576	33.2476	0.00757795	0.180882	0.0462406	1.27961	4.91424	0.280814	89.7191	5.00168	77.1824	5.57807	0.00831982	7.59254e-05
	9M47930	4.5	4	0.000160589	1.64885	0.478087	0.410912	7.64834e-05	40.3719	0.00815004	0.168127	0.049868	1.18636	5.08359	0.268993	92.7328	4.78316	79.695	6.00458	0.00850315	7.66089e-05
	9M47932	5	4	0.000182157	1.36259	0.550212	0.414682	6.12879e-05	75.3036	0.00983113	0.127724	0.0583844	1.01387	5.02973	0.219017	91.7748	3.89656	81.3993	7.25726	0.00892991	7.83946e-05
	9M47933	5.5	4	0.00016327	1.55492	0.479818	0.42485	0.000109628	31.8262	0.00885095	0.205072	0.0535961	1.10491	5.02572	0.241964	91.7035	4.305	79.8686	6.54199	0.00923077	8.83025e-05
	9M47934	6	4	0.000164936	1.61613	0.470223	0.411779	9.49155e-05	42.0015	0.0089661	0.161466	0.0557799	1.06129	5.06218	0.244006	92.3521	4.33976	78.4039	6.63556	0.00955383	8.55169e-05
	9M47936	7	4	0.000188695	1.37938	0.547567	0.391707	0.000127555	26.1262	0.0110336	0.159682	0.0677939	0.872633	5.14142	0.199055	93.7609	3.53753	80.7917	8.18226	0.0101167	8.65888e-05
	9M47937	8	4	0.000168129	1.5205	0.472197	0.432293	0.000142039	22.3094	0.0101444	0.146882	0.0643654	0.919214	5.24861	0.210164	95.6648	3.73103	80.0452	7.5395	0.01081	9.95492e-05
	9M47938	10		0.000191019	1.54441	0.522411	0.407107	0.000159611	21.1248	0.0116301	0.126447	0.0783437	0.756037	5.55938	0.201077	101.173	3.55885	79.9522	8.65381	0.011215	9.63966e-05
	9M47940	12		0.000142432	1.73305	0.401874	0.432528	0.000130781	25.3072	0.0100784	0.132904	0.10002	0.592087	9.11142	0.204131	162.973	3.4915	89.2662	7.52637	0.0126794	0.000115457
	9M47941	15		0.000151373	1.648	0.419126	0.420689	0.000102037	30.699	0.0104528	0.127374	0.1348	0.439072	12.0808	0.199792	213.062	3.32392	91.0676	7.80472	0.0126072	0.000111538
	9M47942	18		9.9205e-05	2.43921	0.25346	0.539555	2.63013e-05	139.486	0.0059746	0.224284	0.042549	1.38999	5.68764	0.33046	103.442	5.84146	77.5093	4.4536	0.0118961	0.000140022
	9M47944	21	4	6.43686e-05	3.75315	0.165059	0.653277	3.43901e-05	104.778	0.00373334	0.317795	0.0258112	2.29227	5.43018	0.522549	98.8854	9.26026	76.1291	2.77935	0.0114001	0.000166987
	9M47945	24	4	5.89449e-05	4.59004	0.120528	0.817587	-1.08971e-05	406.839	0.00268637	0.482591	0.0219751	2.69214	5.3449	0.776074	97.3734	13.7646	63.3018	1.99898	0.0112285	0.000215285
	9M47947	27	4	6.93871e-05	3.49762	0.162017	0.645957	3.64656e-06	933.721	0.00370638	0.366136	0.0268011	2.2081	5.25932	0.527639	95.8549	9.36615	70.5225	2.76026	0.0115344	0.000172926
	9M47948	30	4	5.9508e-05	4.04875	0.10198	0.919117	2.02361e-05	153.377	0.0022295	0.585964	0.0214135	2.7621	5.42648	0.870389	98.8198	15.425	54.7025	1.65797	0.0110069	0.00024253
	9M47950	35	4	4.21379e-05	5.63208	0.0736823	1.28259	2.38663e-05	134.737	0.00178614	0.65926	0.0169375	3.4956	5.87062	1.07242	106.674	18.923	60.1337	1.33254	0.012244	0.000355589
	9M47951	40	4	8.40334e-05	2.92739	0.11612	1.06858	-1.46801e-05	273.192	0.00217982	0.646993	0.0275169	2.14976	5.53258	0.909564	100.699	16.1025	42.2052	1.61227	0.00940012	0.000237617
	9M47953	45	4	5.5902e-05	4.37121	0.0708322	1.30593	-3.88291e-05	107.808	0.00136079	0.965389	0.0180388	3.28058	5.30045	1.44264	96.5849	25.5981	38.5384	1.00737	0.00962855	0.000317216
	9M47954	50	4	0.000101148	2.37951	0.0536968	1.88272	2.63219e-05	128.477	0.00119942	1.03245	0.0327914	1.80411	5.88609	1.61449	106.947	28.4836	20.8598	0.892569	0.0112537	0.000487199
			S	0.0026078	0.454462	6.72989	0.11107	0.00130466	13.1141	0.134874	0.0476514	1.03048	0.269354
	Information on Analysis and Constants Used in Calculations									Results		40(a)/36(a)	± 2s	40(r)/39(k)	± 2s	Age	± 2s	MSWD	39Ar(k)	K/Ca	± 2s
																(Ma)			(%,n)
	Sample = KG14PLG				Age Equations = Min et al. (2000)					Age Plateau				5.08603	0.0819528	92.7762	1.45793	1.06279	71.5615	0.00915298	0.000505005
	Material = plg				Negative Intensities = Allowed										0.0161133		0.0157145	0.384604	18
	Location = Laser				Decay Constant 40K = 5.531 ± 0.013 E-10 1/a
	Analyst = Adam Frew				Decay Constant 39Ar = 2.940 ± 0.029 E-07 1/h					Analytical Error							1.45723	1.03091	Error Magnification
	Project = KERGUELEN_Q JIANG19				Decay Constant 37Ar = 8.264 ± 0.009 E-04 1/h
	Mass Discrimination Law = POW				Decay Constant 36Cl = 2.303 ± 0.046 E-06 1/a					Total Fusion Age				6.02365	0.0719693	109.372	1.26913		22	0.01006	2.45772e-05
	Irradiation = I26t40h				Decay Constant 40K(EC,β⁺) = 0.576 ± 0.002 E-10 1/a										0.0119478		0.0116038
	J = 0.01035170 ± 0.00000259				Decay Constant 40K(β⁻) = 4.955 ± 0.013 E-10 1/a
	FCs = 28.294 ± 0.037 Ma				Atmospheric Ratio 40/36(a) = 298.56 ± 0.30					Analytical Error							1.26802
	IGSN = Undefined				Atmospheric Ratio 38/36(a) = 0.1869 ± 0.0002
	Preferred Age = Undefined				Production Ratio 39/37(ca) = 0.000695 ± 0.000009					Normal Isochron		314.161	18.7451	4.97729	0.128957	90.8416	2.29591	0.948382	71.5615
	Classification = Undefined				Production Ratio 38/37(ca) = 0.000020 ± 0.000001								0.0596671		0.0259091		0.0252737	0.511925	18
	Experiment Type = Undefined				Production Ratio 36/37(ca) = 0.000265 ± 0.000002
	Extraction Method = Undefined				Production Ratio 40/39(k) = 0.000730 ± 0.000091					Analytical Error							2.29548	1	Error Magnification
	Heating = 60 sec				Production Ratio 38/39(k) = 0.012150 ± 0.000030												28		Number of Iterations
	Isolation = 3.00 min				Production Ratio 36/38(cl) = 263.00 ± 13.15												4.70397e-05		Convergence
	Instrument = ARGUS VI				Scaling Ratio K/Ca = 0.520
	Lithology = Undefined				Abundance Ratio 40K/K = 1.1700 ± 0.0100 E-04					Inverse Isochron		315.329	18.8808	5.0021	0.127909	91.2832	2.2767	0.920661	71.5615
	Lat-Lon = Undefined - Undefined				Atomic Weight K = 39.0983 ± 0.0001 g								0.0598766		0.025571		0.0249411	0.544453	18
	Feature = Undefined
										Analytical Error							2.27626	1	Error Magnification
																	4		Number of Iterations
																	0.00015714		Convergence
																	0.632344		Spreading Factor

## Sheet: KG15px
	KG15px	120-747C-13R-1, 82-96
	Relative Abundances			36Ar [V]	%1s	37Ar [V]	%1s	38Ar [V]	%1s	39Ar [V]	%1s	40Ar [V]	%1s	40(r)/39(k)	± 2s	Age	± 2s	40Ar(r)	39Ar(k)	K/Ca	± 2s
																(Ma)		(%)	(%)
	9M46784	2.5	4	1.61296e-05	51.6774	0.00177137	48.7831	6.20971e-06	553.931	0.000312892	3.56235	0.00641364	43.1118	5.57631	23.8796	102.231	425.64	27.0972	1.23216	0.0914905	0.0895041
	9M46785	3	4	2.67893e-05	31.1064	0.00530241	16.0952	-5.80777e-05	74.6657	0.000635594	1.34039	0.0114705	24.1054	6.15806	11.7756	112.571	208.697	33.9247	2.49826	0.0619704	0.0200188
	9M46787	3.5	4	8.2502e-05	10.137	0.00816665	10.5174	4.04354e-05	112.44	0.000834237	1.28221	0.0289295	9.55782	5.96718	8.99594	109.184	159.732	17.0904	3.27573	0.0527574	0.011181
	9M46788	4	4	4.30426e-05	19.4051	0.0128456	6.8014	6.33449e-06	677.326	0.000922388	1.16435	0.0179447	15.4091	6.68836	8.1555	121.945	143.791	34.0466	3.61138	0.0369775	0.00510482
	9M46789	4.5	4	3.28856e-05	25.333	0.0170715	4.98018	-6.33947e-06	642.307	0.000829922	1.1316	0.0135728	20.3719	6.23984	9.09527	114.019	161.064	37.6087	3.2342	0.0249181	0.0025473
	9M46791	5	4	4.47778e-05	18.5949	0.0158826	5.44898	-4.21087e-06	909.121	0.000761605	1.08219	0.0170322	16.2341	6.5542	9.91056	119.578	174.963	28.8828	2.96738	0.0245738	0.00273218
	9M46792	5.5	4	2.71926e-05	30.6252	0.00762356	11.1011	4.52901e-05	108.658	0.000683225	1.26272	0.0116822	23.6691	6.1486	10.9733	112.403	194.495	35.6807	2.6802	0.0462411	0.0103341
	9M46793	6	4	2.43418e-05	34.2857	0.00693971	12.6328	9.28979e-05	40.8208	0.000622458	1.46395	0.0101983	27.113	5.64179	12.0561	103.398	214.755	34.1681	2.44183	0.0462801	0.0117728
	9M46795	7	4	3.68424e-05	22.6154	0.00970379	8.82551	4.35295e-05	121.422	0.000753505	1.05475	0.0148421	18.6295	6.17525	9.96388	112.875	176.558	31.0699	2.95233	0.0400169	0.00711485
	9M46796	8	4	3.1276e-05	26.6771	0.00869894	10.1721	-8.36948e-06	557.914	0.000745641	1.59658	0.0133208	20.757	6.31524	10.0678	115.354	178.155	35.0634	2.924	0.0442111	0.0091066
	9M46797	10	4	6.26672e-05	13.3205	0.0154978	5.50566	4.53115e-06	909.597	0.00123216	0.898242	0.0236448	11.694	5.04356	6.09723	92.7098	109.253	26.0529	4.82878	0.0409815	0.0045735
	9M46799	12	4	6.327e-05	13.1873	0.0281723	3.14685	7.66349e-05	60.3576	0.00160048	0.495746	0.0230873	11.9763	4.06609	4.70939	75.1097	85.2107	27.8426	6.25013	0.0291801	0.00185988
	9M46800	15		0.000137372	6.07607	0.118475	0.772773	0.000107296	32.2204	0.00229148	0.557866	0.0374106	7.39115	2.61302	3.37159	48.625	61.905	15.4302	8.73388	0.00969614	0.000187535
	9M46802	18		0.000276968	3.04806	0.316213	0.394199	8.60069e-05	43.5012	0.00256562	0.45118	0.058625	4.71641	0.405385	3.19632	7.62994	60.0326	1.62213	9.27437	0.00385766	4.97073e-05
	9M46803	21		0.000403144	2.10036	0.792777	0.294417	6.19563e-05	61.9671	0.00263583	0.414134	0.0490851	5.63309	-4.10385	3.63451	-79.1093	71.6171	-17.4308	8.24248	0.0013675	1.90452e-05
	9M46805	24		0.00083639	1.04887	2.12151	0.276669	0.000138457	33.4993	0.00344373	0.275453	0.0489293	5.6512	-16.7232	4.16874	-346.619	95.2419	-67.3068	7.78559	0.000482687	1.10022e-05
	9M46806	27		0.00110493	0.793615	2.91337	0.275299	0.000113937	35.202	0.00346648	0.265568	0.0537274	5.14643	-31.6721	6.12163	-725.147	172.428	-84.9871	5.69974	0.000257323	1.02498e-05
	9M46808	30		0.00140143	0.614015	3.90513	0.274447	8.33119e-05	49.5537	0.00399903	0.275094	0.0447974	6.17236	-50.3092	7.83045	-1345.25	310.79	-144.306	5.08011	0.000171103	1.00843e-05
	9M46809	35		0.00203543	0.441742	5.56741	0.274012	0.000192804	16.1886	0.00546738	0.181727	0.0771105	3.58575	-56.385	7.79002	-1604.06	356.766	-116.851	6.31783	0.000149257	9.81472e-06
	9M46811	40		0.00161495	0.550022	4.19398	0.274909	0.000131171	29.4519	0.00397648	0.223624	0.0791801	3.49205	-67.0247	10.3861	-2171.84	651.134	-89.8679	4.19729	0.000131632	9.88063e-06
	9M46812	45		0.00156674	0.561139	3.71817	0.274683	0.000105383	34.438	0.00322847	0.392313	0.110704	2.49781	-97.597	18.1209	0	18930.8	-56.8053	2.54742	9.01139e-05	1.02484e-05
	9M46814	50		0.00112599	0.792416	2.40376	0.275937	0.000115596	40.3089	0.0020563	0.546947	0.102829	2.68904	-111.919	26.1089	0	2940.79	-41.9776	1.5248	8.34335e-05	1.07778e-05
	9M46815	60		0.00123827	0.712414	2.52378	0.275778	0.000112735	35.5629	0.00218405	0.50416	0.128198	2.15702	-97.2593	22.7919	0	29584.3	-32.6247	1.70012	8.86029e-05	1.06345e-05
			S	0.0122333	0.334022	28.7123	0.0980684	0.00148752	13.4221	0.045249	0.108915	0.982735	1.34937
	Information on Analysis and Constants Used in Calculations									Results		40(a)/36(a)	± 2s	40(r)/39(k)	± 2s	Age	± 2s	MSWD	39Ar(k)	K/Ca	± 2s
																(Ma)			(%,n)
	Sample = KG15CPX				Age Equations = Min et al. (2000)					Age Plateau Overestimated Error				5.45457	2.45635	100.06	43.8356	0.0573617	38.8964	0.0299362	0.00399563
	Material = cpx				Negative Intensities = Allowed										0.450328		0.438095	0.999995	12
	Location = Laser				Decay Constant 40K = 5.531 ± 0.013 E-10 1/a
	Analyst = Fred Jourdan				Decay Constant 39Ar = 2.940 ± 0.029 E-07 1/h					Analytical Error							43.8355	1	Error Magnification
	Project = KERGUELEN_Q JIANG19				Decay Constant 37Ar = 8.264 ± 0.009 E-04 1/h
	Mass Discrimination Law = POW				Decay Constant 36Cl = 2.303 ± 0.046 E-06 1/a					Total Fusion Age				-15.7342	1.53798	-324.162	34.7059		23	0.000458092	3.94785e-06
	Irradiation = I26t40h				Decay Constant 40K(EC,β⁺) = 0.576 ± 0.002 E-10 1/a										0.0977479		0.107063
	J = 0.01043120 ± 0.00000522				Decay Constant 40K(β⁻) = 4.955 ± 0.013 E-10 1/a
	FCs = 28.294 ± 0.037 Ma				Atmospheric Ratio 40/36(a) = 298.56 ± 0.30					Analytical Error							34.7041
	IGSN = Undefined				Atmospheric Ratio 38/36(a) = 0.1869 ± 0.0002
	Preferred Age = Undefined				Production Ratio 39/37(ca) = 0.000695 ± 0.000009					Normal Isochron Overestimated Error		324.079	159.486	4.20203	7.64376	77.5677	138.117	0.0539128	38.8964
	Classification = Undefined				Production Ratio 38/37(ca) = 0.000020 ± 0.000001								0.492122		1.81906		1.7806	0.999991	12
	Experiment Type = Undefined				Production Ratio 36/37(ca) = 0.000265 ± 0.000002
	Extraction Method = Undefined				Production Ratio 40/39(k) = 0.000730 ± 0.000091					Analytical Error							138.117	1	Error Magnification
	Heating = 60 sec				Production Ratio 38/39(k) = 0.012150 ± 0.000030												6		Number of Iterations
	Isolation = 3.00 min				Production Ratio 36/38(cl) = 263.00 ± 13.15												1.07267e-05		Convergence
	Instrument = ARGUS VI				Scaling Ratio K/Ca = 0.520
	Lithology = Undefined				Abundance Ratio 40K/K = 1.1700 ± 0.0100 E-04					Inverse Isochron Overestimated Error		319.976	161.392	4.56692	6.40722	84.1489	115.353	0.0534134	38.8964
	Lat-Lon = Undefined - Undefined				Atomic Weight K = 39.0983 ± 0.0001 g								0.504388		1.40296		1.37082	0.999991	12
	Feature = Undefined
										Analytical Error							115.353	1	Error Magnification
																	4		Number of Iterations
																	0.000105709		Convergence
																	0.181942		Spreading Factor

## Sheet: KG16pl
	KG16pl	120-747C-14R-1, 5-15
	Relative Abundances			36Ar [V]	%1s	37Ar [V]	%1s	38Ar [V]	%1s	39Ar [V]	%1s	40Ar [V]	%1s	40(r)/39(k)	± 2s	Age	± 2s	40Ar(r)	39Ar(k)	K/Ca	± 2s
																(Ma)		(%)	(%)
	9M49381	1	4	8.13031e-07	84.081	-0.000967186	158.951	-2.14908e-05	159.353	2.07983e-05	40.9806	0.000241592	34.7202	-3.61819	23.6487	-69.5646	463.539	-32.1552	0.663817	-0.0115435	0.0378415
	9M49382	2	4	1.41473e-06	45.445	0.00325364	45.2384	-4.67788e-05	80.9386	0.000131321	7.6972	0.00122462	6.86339	8.20987	3.93363	148.574	68.3405	86.5222	3.99022	0.0206265	0.0189426
	9M49384	3	4	1.1708e-06	41.9353	0.00557721	28.4148	2.93819e-05	140.71	0.00020704	6.58579	0.00170165	4.92569	8.84013	2.38894	159.49	41.2542	105.544	6.28133	0.0189423	0.0110629
	9M49385	4	4	9.15777e-07	67.7726	0.00514131	32.3512	2.71497e-05	167.314	0.000246924	3.76818	0.00172223	4.83863	7.63476	2.07519	138.554	36.2535	107.879	7.52381	0.0246128	0.0160376
	9M49387	4.5	4	1.13903e-06	58.4278	0.00394181	42.129	-9.7777e-06	339.159	0.000160157	6.69015	0.00140255	5.90313	8.72988	3.4199	157.585	59.1199	97.9811	4.86695	0.0207663	0.0177268
	9M49388	5	4	5.58657e-07	99.1139	0.00371541	39.9338	7.91322e-06	448.282	0.000131954	8.30769	0.000815243	10.1266	7.28884	3.60521	132.501	63.1939	115.668	3.99987	0.0181066	0.0147861
	9M49390	6	4	1.48671e-06	35.6751	0.000762741	221.326	-3.38106e-05	125.556	0.000148125	7.3118	0.0011095	7.67106	4.91797	3.12043	90.4579	55.9832	65.4229	4.56328	0.100623	0.445658
	9M49391	7	4	3.65049e-06	17.9772	0.00959109	17.6044	-5.32628e-05	86.8043	0.000394459	3.02592	0.00286801	2.875	6.54128	1.35699	119.349	23.9596	88.447	11.9896	0.021025	0.00751603
	9M49393	8	4	1.40848e-06	45.8322	0.000341949	450.547	-3.05465e-05	107.546	0.00010964	10.2091	0.000714816	11.6711	2.93662	4.47996	54.5569	81.9861	44.945	3.38246	0.166368	1.49952
	9M49394	12	4	4.05865e-06	13.2	0.00986681	18.4035	3.23455e-05	120.998	0.000432248	2.5267	0.00268024	3.08737	5.29303	1.11773	97.1743	19.9786	84.0074	13.152	0.0224189	0.00833272
	9M49396	15	4	1.63987e-06	36.1193	0.00177945	100.241	4.04461e-05	99.4406	8.8185e-05	10.4107	0.000804607	10.3107	5.28814	5.65736	97.0871	101.126	57.1452	2.68823	0.0254085	0.0512266
	9M49397	20	4	1.77186e-06	33.5093	0.00316328	43.9808	-7.97007e-06	498.442	0.000192268	6.22062	0.00157484	5.39602	6.81835	2.52229	124.235	44.4146	82.292	5.8765	0.0312449	0.0277652
	9M49399	30	4	3.22604e-06	22.1594	0.00356478	48.9764	-2.30534e-05	224.114	0.000301367	3.42145	0.002591	3.22138	6.38916	1.84479	116.662	32.6208	73.7033	9.24093	0.0435994	0.0428141
	9M49400	40	4	5.54064e-06	10.3483	0.00433181	38.4044	-1.44195e-05	283.822	0.000707494	1.28807	0.00638558	1.29424	7.20184	0.682798	130.975	11.9785	79.4537	21.7809	0.0845677	0.0649929
			S	2.87948e-05	7.93095	0.0540641	11.2619	-0.000103874	145.454	0.00327198	1.22377	0.0258365	1.20851
	Information on Analysis and Constants Used in Calculations									Results		40(a)/36(a)	± 2s	40(r)/39(k)	± 2s	Age	± 2s	MSWD	39Ar(k)	K/Ca	± 2s
																(Ma)			(%,n)
	Sample = KG16PLG				Age Equations = Min et al. (2000)					Age Plateau				6.75604	0.566848	123.137	9.9883	1.52931	100	0.0214005	0.00415693
	Material = san				Negative Intensities = Allowed										0.0839025		0.0811151	0.0982152	14
	Location = Laser				Decay Constant 40K = 5.531 ± 0.013 E-10 1/a
	Analyst = Adam Frew				Decay Constant 39Ar = 2.940 ± 0.029 E-07 1/h					Analytical Error							9.98759	1.23665	Error Magnification
	Project = KERGUELEN_Q JIANG19				Decay Constant 37Ar = 8.264 ± 0.009 E-04 1/h
	Mass Discrimination Law = POW				Decay Constant 36Cl = 2.303 ± 0.046 E-06 1/a					Total Fusion Age				6.65575	0.575595	121.37	10.1523		14	0.0311092	0.00704965
	Irradiation = I26t40h				Decay Constant 40K(EC,β⁺) = 0.576 ± 0.002 E-10 1/a										0.0864808		0.0836478
	J = 0.01043120 ± 0.00000522				Decay Constant 40K(β⁻) = 4.955 ± 0.013 E-10 1/a
	FCs = 28.294 ± 0.037 Ma				Atmospheric Ratio 40/36(a) = 298.56 ± 0.30					Analytical Error							10.1516
	IGSN = Undefined				Atmospheric Ratio 38/36(a) = 0.1869 ± 0.0002
	Preferred Age = Undefined				Production Ratio 39/37(ca) = 0.000695 ± 0.000009					Normal Isochron No Convergence		17.138	138.449	8.78713	0.907324	158.575	15.6771	1.03573	100
	Classification = Undefined				Production Ratio 38/37(ca) = 0.000020 ± 0.000001								8.07849		0.103256		0.0988624	0.411886	14
	Experiment Type = Undefined				Production Ratio 36/37(ca) = 0.000265 ± 0.000002
	Extraction Method = Undefined				Production Ratio 40/39(k) = 0.000730 ± 0.000091					Analytical Error							15.6763	1.01771	Error Magnification
	Heating = 60 sec				Production Ratio 38/39(k) = 0.012150 ± 0.000030												100		Number of Iterations
	Isolation = 3.00 min				Production Ratio 36/38(cl) = 263.00 ± 13.15												0.00149289		Convergence
	Instrument = ARGUS VI				Scaling Ratio K/Ca = 0.520
	Lithology = Undefined				Abundance Ratio 40K/K = 1.1700 ± 0.0100 E-04					Inverse Isochron		608.183	517.953	5.41865	1.20265	99.4184	21.4701	1.18769	100
	Lat-Lon = Undefined - Undefined				Atomic Weight K = 39.0983 ± 0.0001 g								0.85164		0.221947		0.215958	0.284886	14
	Feature = Undefined
										Analytical Error							21.4699	1.08981	Error Magnification
																	10		Number of Iterations
																	0.000223996		Convergence
																	0.379454		Spreading Factor

## Sheet: KG16gm
	KG16gm	120-747C-14R-1, 5-15
	Relative Abundances			36Ar [V]	%1s	37Ar [V]	%1s	38Ar [V]	%1s	39Ar [V]	%1s	40Ar [V]	%1s	40(r)/39(k)	± 2s	Age	± 2s	40Ar(r)	39Ar(k)	K/Ca	± 2s
																(Ma)		(%)	(%)
	0M58191	3		0.00256679	0.622516	0.601872	8.73566	0.00175295	6.21285	0.0189503	0.220901	0.844302	0.442391	6.78693	0.799162	127.363	14.4809	14.8969	1.69732	0.0160111	0.00279901
	0M58193	4	4	0.00281601	0.578735	0.424235	10.7118	0.00219038	4.92605	0.0363579	0.14035	1.01652	0.367398	5.8106	0.397613	109.584	7.276	20.6143	3.30298	0.0442038	0.00947116
	0M58195	5	4	0.00274345	0.609685	0.440761	10.422	0.00196733	5.67371	0.0497523	0.122564	1.07162	0.34848	5.81535	0.294341	109.671	5.38596	26.8327	4.5287	0.0583352	0.0121604
	0M58196	6	4	0.00264714	0.599968	0.585266	8.80453	0.00169231	6.43611	0.0576334	0.110274	1.09033	0.342479	6.05249	0.256703	114.005	4.68599	31.7669	5.24133	0.050845	0.00895428
	0M58198	7	4	0.00184046	0.778395	0.602965	9.46307	0.00151268	7.28619	0.0636338	0.113018	0.882809	0.422989	6.02804	0.230931	113.559	4.21659	43.1646	5.78977	0.0545167	0.0103189
	0M58199	8	4	0.00121775	1.08349	0.531433	9.1283	0.00132482	8.69306	0.0647197	0.106931	0.712073	0.524391	6.06935	0.207653	114.313	3.78997	54.849	5.89378	0.062966	0.0114964
	0M58201	9	4	0.000828277	1.54808	0.459934	11.4696	0.00114262	9.81191	0.0670512	0.110794	0.615311	0.606844	6.06008	0.204174	114.144	3.72681	65.7226	6.11187	0.0754465	0.0173079
	0M58202	10	4	0.000665061	1.91822	0.41901	13.7426	0.00109138	10.2311	0.0696776	0.105547	0.586843	0.636345	6.07338	0.202945	114.386	3.70388	71.8096	6.35503	0.0861098	0.0236683
	0M58204	12	4	0.000758851	1.68895	0.578098	9.11532	0.00139609	8.7369	0.106564	0.0978902	0.826275	0.451912	6.07911	0.128604	114.491	2.34698	78.1063	9.72331	0.0954933	0.0174102
	0M58205	14	4	0.000693507	1.83012	0.539076	9.93399	0.0016996	6.8728	0.120361	0.0977349	0.880982	0.423913	5.97165	0.114222	112.529	2.08678	81.3316	10.9894	0.11574	0.0229965
	0M58207	16	4	0.000492986	2.52489	0.395791	13.6136	0.0016544	6.65615	0.0977764	0.0987115	0.687934	0.542818	5.86727	0.139698	110.621	2.5549	83.1573	8.93005	0.1281	0.0348791
	0M58208	18	4	0.00057639	2.16727	0.611042	9.64984	0.00159499	7.03074	0.0994756	0.0987871	0.704227	0.530255	5.86033	0.143046	110.494	2.61632	82.4267	9.07197	0.0842929	0.0162693
	0M58210	20	4	0.000326972	3.78301	0.415288	16.1584	0.000840115	12.8715	0.0600913	0.110866	0.410399	0.909972	5.77907	0.250432	109.007	4.58417	84.2117	5.47727	0.0748816	0.0242002
	0M58211	21	4	0.000235562	5.24479	0.297713	20.7493	0.000502331	22.0335	0.0406227	0.129801	0.278384	1.34133	5.72992	0.355571	108.107	6.51199	83.1871	3.70164	0.0705922	0.0292957
	0M58213	22	4	0.000159746	7.71901	0.201794	31.7711	0.000370746	29.5044	0.026334	0.168876	0.179145	2.08439	5.62744	0.557812	106.229	10.2265	82.2816	2.39905	0.0674982	0.0428911
	0M58214	24	4	0.000163854	7.54287	0.278719	20.6037	0.000333291	34.4492	0.0230086	0.183307	0.158335	2.35823	5.76189	0.609546	108.692	11.1597	83.0242	2.08959	0.0425653	0.0175414
	0M58216	26	4	0.000137473	8.96738	0.305626	15.7322	0.000355716	30.8372	0.0182172	0.233532	0.125084	2.98526	6.01124	0.72083	113.252	13.1639	86.5267	1.64904	0.0306337	0.00964048
	0M58217	28	4	0.000146261	8.43717	0.246821	23.7302	0.000177588	62.4751	0.0168852	0.239674	0.119492	3.12487	5.70436	0.838717	107.639	15.3644	79.788	1.53078	0.0352121	0.0167135
	0M58219	30	4	0.000137232	9.00242	0.294556	18.7647	0.000114318	95.5934	0.0164655	0.24851	0.112131	3.32995	5.80859	0.84156	109.547	15.4002	84.2337	1.48931	0.0287062	0.0107751
	0M58220	40	4	0.000295694	4.18696	0.594294	8.56391	0.000316933	35.0809	0.0263505	0.168151	0.18715	1.99512	5.62384	0.511941	106.163	9.38586	77.9419	2.37559	0.022695	0.00388844
	0M58222	50	4	0.000285592	4.38995	0.688516	7.24913	0.000320398	35.1007	0.0185177	0.216818	0.140291	2.66156	6.07008	0.734283	114.326	13.4016	78.0515	1.65219	0.0136241	0.0019769
			S	0.0197351	0.311269	9.51281	2.63713	0.022351	2.28959	1.09845	0.0282609	11.6296	0.147144
	Information on Analysis and Constants Used in Calculations									Results		40(a)/36(a)	± 2s	40(r)/39(k)	± 2s	Age	± 2s	MSWD	39Ar(k)	K/Ca	± 2s
																(Ma)			(%,n)
	Sample = KG16GM				Age Equations = Min et al. (2000)					Age Plateau				5.95591	0.0522829	112.241	0.967405	1.09522	98.3027	0.024036	0.00875695
	Material = gm				Negative Intensities = Allowed										0.00877832		0.00861898	0.347442	20
	Location = Laser				Decay Constant 40K = 5.531 ± 0.013 E-10 1/a
	Analyst = Adam Frew				Decay Constant 39Ar = 2.940 ± 0.029 E-07 1/h					Analytical Error							0.955332	1.04653	Error Magnification
	Project = KERGUELEN_Q JIANG19				Decay Constant 37Ar = 8.264 ± 0.009 E-04 1/h
	Mass Discrimination Law = POW				Decay Constant 36Cl = 2.303 ± 0.046 E-06 1/a					Total Fusion Age				5.94461	0.0588622	112.035	1.08637		21	0.0596831	0.00314808
	Irradiation = I27t40h				Decay Constant 40K(EC,β⁺) = 0.576 ± 0.002 E-10 1/a										0.00990177		0.00969675
	J = 0.01075270 ± 0.00000753				Decay Constant 40K(β⁻) = 4.955 ± 0.013 E-10 1/a
	GA1550 = 99.738 ± 0.100 Ma				Atmospheric Ratio 40/36(a) = 298.56 ± 0.30					Analytical Error							1.07567
	IGSN = Undefined				Atmospheric Ratio 38/36(a) = 0.1869 ± 0.0002
	Preferred Age = Undefined				Production Ratio 39/37(ca) = 0.000695 ± 0.000009					Normal Isochron		299.389	3.94297	5.92944	0.0699892	111.757	1.28818	1.25784	98.3027
	Classification = Undefined				Production Ratio 38/37(ca) = 0.000020 ± 0.000001								0.0131701		0.0118037		0.0115265	0.204757	20
	Experiment Type = Undefined				Production Ratio 36/37(ca) = 0.000265 ± 0.000002
	Extraction Method = Undefined				Production Ratio 40/39(k) = 0.000730 ± 0.000091					Analytical Error							1.27921	1.12154	Error Magnification
	Heating = 60 sec				Production Ratio 38/39(k) = 0.012150 ± 0.000030												74		Number of Iterations
	Isolation = 3.00 min				Production Ratio 36/38(cl) = 263.00 ± 13.15												5.80059e-05		Convergence
	Instrument = ARGUS VI				Scaling Ratio K/Ca = 0.520
	Lithology = Undefined				Abundance Ratio 40K/K = 1.1700 ± 0.0100 E-04					Inverse Isochron		298.891	3.78945	5.9537	0.0676146	112.201	1.24486	1.14915	98.3027
	Lat-Lon = Undefined - Undefined				Atomic Weight K = 39.0983 ± 0.0001 g								0.0126783		0.0113567		0.0110949	0.295618	20
	Feature = Undefined
										Analytical Error							1.2355	1.07198	Error Magnification
																	4		Number of Iterations
																	0.000162583		Convergence
																	0.659389		Spreading Factor

[truncated: 38 more sheets: KG20pl, KG25pl, KG26pl, KG28pl, KG32pl, KG38pl, KG38px, KG40px, KG41gm, KG42gm, KG43gl, KG43px, KG48pl, KG50pl, KG51pl, KG52gm, KG53px, KG53Rpx, KG54gm, KG57pl …]
